# Supplementary material
Source: PubMed Central journal article supplement (PMC8338775)
Supplement: NIHMS1686435-supplement-1.pdf [file NIHMS1686435-supplement-1.pdf]

# Leukocyte Heterogeneity in Pancreatic Ductal Adenocarcinoma: Phenotypic and Spatial Features Associated with Clinical Outcome

Shannon M. Liudahl<sup>1,#,a</sup>, Courtney B. Betts<sup>1,#</sup>, Shamilene Sivagnanam<sup>1,2,#</sup>, Vicente Morales-Oyarvide<sup>3</sup>, Annacarolina da Silva<sup>3</sup>, Chen Yuan<sup>3</sup>, Samuel Hwang<sup>4</sup>, Alison Grossblatt-Wait<sup>5,6</sup>, Kenna R. Leis<sup>1</sup>, William Larson<sup>1</sup>, Meghan B. Lavoie<sup>1</sup>, Padraic Robinson<sup>1</sup>, Andressa Dias Costa<sup>3</sup>, Sara A. Väyrynen<sup>3</sup>, Thomas E. Clancy<sup>7</sup>, Douglas A. Rubinson<sup>3</sup>, Jason Link<sup>6,8</sup>, Dove Keith<sup>6</sup>, Wesley Horton<sup>1,2</sup>, Margaret A. Tempero<sup>9</sup>, Robert H. Vonderheide<sup>10</sup>, Elizabeth M. Jaffee<sup>11</sup>, Brett Sheppard<sup>6,12</sup>, Jeremy Goecks<sup>2</sup>, Rosalie C. Sears<sup>5,6,8</sup>, Byung S. Park<sup>5</sup>, Motomi Mori<sup>5</sup>, Jonathan A. Nowak<sup>13,^</sup>, Brian M. Wolpin<sup>3,^</sup>, and Lisa M. Coussens<sup>1,5,6,^,\*</sup>

## SUPPLEMENTARY DATA

### SUPPLEMENTARY MATERIALS AND METHODS

#### *ROI Selection*

Whole-slide digital images of hematoxylin and PanCK staining from each tissue sample were annotated by a pathologist (S.H.) in Aperio ImageScope software (Leica Biosystems) to demarcate areas with different histopathology. Pathology annotations and CD45 immunoreactivity were used in combination to select leukocyte-infiltrated ROIs distributed throughout tissues. Areas of necrosis were excluded. ROIs containing invasive carcinoma ('T' regions) were evaluated in all specimens (1-4 ROIs per specimen). ROIs in the following histopathological regions were also analyzed in samples where they were identified: TAS located outside of annotated invasive carcinoma (1-2 ROIs per specimen), AN located outside of annotated invasive carcinoma (1-2 ROIs per specimen), LN (1-2 ROIs per specimen), pre-invasive dysplasia (1-3 ROIs per specimen), and TLS located within or outside annotated invasive carcinoma. For TLS analysis, TLS were manually identified by evaluation of hematoxylin, CD45, and CD20 immunoreactivity and assessed for MECA-79 positivity (n = 787 TLS total). All identified TLS were quantitatively analyzed for CD45<sup>+</sup>CD3<sup>+</sup> (T cell) and CD45<sup>+</sup>CD20<sup>+</sup> (B cell) density. A subset of

TLS (n = 173 total, 1-6 TLS ROIs per specimen) were randomly selected for full image cytometry analysis of myeloid, lymphoid, and functional mIHC panels. For HN pancreas, 3 ROIs were evaluated per specimen. ROI quantity, area, and placement were maintained across serial tissue sections in all samples to ensure the same regions were assessed with each antibody panel. Unless otherwise stated, data presented represent cumulative cell densities from multiple ROIs within an individual patient sample, grouped by histopathologic type. Cumulative density of each leukocyte population was calculated by: total cell number in all ROIs / total tissue area of all ROIs = cumulative cell density in mm<sup>2</sup>.

For spatial mapping, proximity of individual ROIs to nearest annotated area of invasive carcinoma was manually measured in Aperio ImageScope software, and ROIs were assigned to spatial categories as shown in **Figure 2E**. Measurement criteria for these spatial categories were selected to most comprehensively encapsulate ROIs distributed across extensive regions of tissue. Sankey diagrams were generated with the alluvial R package (1).

### *Image Processing and Analysis*

Image co-registration and processing were performed using methods adapted from our previously described workflow (2,3). ROIs from each single antibody stain were registered to the same regions on the hematoxylin-stained image using the detectSURFfeatures algorithm in the Computer Vision Toolbox in MATLAB version R2018b (The MathWorks, Inc., Natick, MA). This approach used an affine transformation, and only ROIs that were well-registered were included for downstream analysis. Image processing, cell quantification, and image cytometry were performed using Fiji, CellProfiler Version 3.5.1 (4), and FCS Express 6 Image Cytometry RUO (De Novo Software, Glendale, CA), respectively.

AEC chromogen signal was extracted in Fiji for cell quantification and visualization using a custom macro for color deconvolution. Briefly, the plugin Color\_Deconvolution [H AEC] was used to separate hematoxylin, followed by postprocessing steps for signal cleaning and background elimination. The processed hematoxylin image was used to generate a nuclei binary mask. AEC signal was extracted with the NIH plugin RGB\_to\_CMYK to separate AEC signal into the Y channel (5). Signal extracted images were processed in CellProfiler to quantify single cell mean intensity measurements for each stain, scaled to a range of 0-1. The binary segmentation mask produced in Fiji was used to identify nuclei with the IdentifyPrimaryObjects module and mean intensity for each object for every marker measured using the MeasureObjectIntensity module. The output of these processes is mean signal intensity of every cell for each antibody stain, with data subsequently imported into FCS Express for manually gated single-cell image cytometry. Hierarchical cell classifications and image cytometry gating strategies are shown in **Figures 1C** and **S1A-C**. For mIHC visualization, single channel images were merged in pseudocolor using Fiji.

#### *vTMA Analysis*

1.0 mm vTMA cores were generated in Fiji and overlaid in Aperio ImageScope onto existing T ROIs that had been evaluated by mIHC (n = 5 treatment-naïve PDAC specimens). 19-28 vTMA cores were evaluated per specimen, depending on mIHC ROI area, and mIHC staining within each core was quantitatively evaluated by image cytometry in FCS Express. For each specimen, combinations of cores (1-18 vTMA cores per combination) were randomly sampled 100 times to generate a distribution of CD3<sup>+</sup> T cell, CD20<sup>+</sup> B cell, and CD68<sup>+</sup> monocyte/macrophage immunostaining per ‘N’ cores. These distributions were compared to a vTMA core reference mean (average percent positive cells from all

vTMA cores per patient) and a mIHC weighted mean (average percent positive cells from all mIHC T ROIs per patient, weighted by the number of vTMA cores contained within each ROI).

### *Molecular Status Determination*

Molecular status of *KRAS*, *TP53*, *CDKN2A*, and *SMAD4* was determined for a subset of samples using integrated DNA sequencing and IHC approaches. For Cohort 1 samples, DNA was extracted from FFPE sections, and *KRAS*, *TP53*, and *CDKN2A* alterations were identified through DNA sequencing with either the 595-gene Tempus xT targeted cancer genome sequencing panel (Tempus, Chicago, IL), or the 124-gene GeneTrails Comprehensive Solid Tumor Panel clinical assay (Knight Diagnostics Laboratories, OHSU). *SMAD4* was detected by IHC as previously described (6), and slides were reviewed by three pathologists (J.A.N, A.D.C., S.A.V.) who jointly assigned Smad4 classification. For Cohort 2 samples, *KRAS* status was determined via combination of pyrosequencing and next generation sequencing; status of *CDKN2A*, *TP53*, and *SMAD4* were determined using a combination of next generation sequencing and IHC, as previously reported (6).

### *Unsupervised Analysis*

Hierarchical clustering and heatmap generation was performed using the pheatmap R package (7). t-SNEs were generated in R with Rtsne (8). PCA was performed with the factoextra R package (9).

## SUPPLEMENTARY REFERENCES

1. Bojanowski ME, R. 2016 alluvial: R Package for Creating Alluvial Diagrams. R package version: 0.1-2. <<https://github.com/mbojan/alluvial>>. Accessed 2020.
2. Tsujikawa T, Kumar S, Borkar RN, Azimi V, Thibault G, Chang YH, *et al.* Quantitative Multiplex Immunohistochemistry Reveals Myeloid-Inflamed Tumor-Immune Complexity Associated with Poor Prognosis. *Cell Rep* 2017;**19**(1):203-17 doi 10.1016/j.celrep.2017.03.037.
3. Banik G, Betts CB, Liudahl SM, Sivagnanam S, Kawashima R, Cotechini T, *et al.* High-dimensional multiplexed immunohistochemical characterization of immune contexture in human cancers. *Methods in enzymology* 2020;**635**:1-20 doi 10.1016/bs.mie.2019.05.039.
4. Carpenter AE, Jones TR, Lamprecht MR, Clarke C, Kang IH, Friman O, *et al.* CellProfiler: image analysis software for identifying and quantifying cell phenotypes. *Genome Biol* 2006;**7**(10):R100 doi 10.1186/gb-2006-7-10-r100.
5. Pham NA, Morrison A, Schwock J, Aviel-Ronen S, Iakovlev V, Tsao MS, *et al.* Quantitative image analysis of immunohistochemical stains using a CMYK color model. *Diagn Pathol* 2007;**2**:8 doi 10.1186/1746-1596-2-8.
6. Qian ZR, Rubinson DA, Nowak JA, Morales-Oyarvide V, Dunne RF, Kozak MM, *et al.* Association of Alterations in Main Driver Genes With Outcomes of Patients With Resected Pancreatic Ductal Adenocarcinoma. *JAMA Oncol* 2018;**4**(3):e173420 doi 10.1001/jamaoncol.2017.3420.
7. Kolde R. 2019 pheatmap: Pretty Heatmaps. R package version 1.0.12. <<https://CRAN.R-project.org/package=pheatmap>>. Accessed 2020.
8. Krijthe JH. 2015 2020. Rtsne: T-Distributed Stochastic Neighbor Embedding using a Barnes-Hut Implementation. <<https://github.com/jkrijthe/Rtsne>>. 2020.
9. Kassambara AM, F. 2020 factoextra: Extract and Visualize the Results of Multivariate Data Analyses. R package version 1.0.7. <<https://cran.r-project.org/web/packages/factoextra/index.html>>. Accessed 2020.

## SUPPLEMENTARY TABLES

**Supplementary Table S1.** Baseline characteristics of treatment-naïve patients with surgically resected PDAC

|                                                | Total             | OHSU (Cohort 1)   | DF/BWCC (Cohort 2) | <i>P</i> <sup>a</sup> |
|------------------------------------------------|-------------------|-------------------|--------------------|-----------------------|
| Number of subjects                             | 104               | 46                | 58                 |                       |
| Women, n (%)                                   | 57 (55%)          | 24 (52%)          | 33 (57%)           | 0.69                  |
| Age in years, median (Q1, Q3)                  | 64.0 (56.0, 71.5) | 63.5 (58.0, 71.0) | 64.5 (54.0, 72.0)  | 0.97                  |
| Tumor location, n (%)                          |                   |                   |                    |                       |
| Head/Uncinate                                  | 81 (78%)          | 40 (87%)          | 41 (71%)           | 0.06                  |
| Body/Tail                                      | 23 (22%)          | 6 (13%)           | 17 (29%)           |                       |
| Tumor size in cm, median (Q1, Q3) <sup>b</sup> | 3.0 (2.5, 4.0)    | 3.4 (2.5, 4.5)    | 3.0 (2.5, 3.5)     | 0.23                  |
| AJCC 8 <sup>th</sup> ed. pT stage, n (%)       |                   |                   |                    |                       |
| T1                                             | 11 (11%)          | 7 (15%)           | 4 (8%)             | 0.06                  |
| T2                                             | 62 (63%)          | 23 (50%)          | 39 (75%)           |                       |
| T3                                             | 23 (24%)          | 15 (33%)          | 8 (15%)            |                       |
| T4                                             | 2 (2%)            | 1 (2%)            | 1 (2%)             |                       |
| Tx (cannot be assessed)                        | 6                 | -                 | 6                  |                       |
| AJCC 8 <sup>th</sup> ed. pN stage, n (%)       |                   |                   |                    |                       |
| N0                                             | 28 (27%)          | 12 (26%)          | 16 (27%)           | 0.64                  |
| N1                                             | 38 (36.5%)        | 15 (33%)          | 23 (40%)           |                       |
| N2                                             | 38 (36.5%)        | 19 (41%)          | 19 (33%)           |                       |
| Tumor differentiation, n (%)                   |                   |                   |                    |                       |
| Well/Moderately differentiated                 | 53 (52%)          | 23 (51%)          | 30 (54%)           | 0.84                  |
| Poorly differentiated/Undifferentiated         | 48 (48%)          | 22 (49%)          | 26 (46%)           |                       |
| Unknown                                        | 3                 | 1                 | 2                  |                       |
| Resection margin status, n (%)                 |                   |                   |                    |                       |
| R0                                             | 43 (41%)          | 20 (44%)          | 23 (40%)           | 0.54                  |
| R1                                             | 60 (58%)          | 25 (54%)          | 35 (60%)           |                       |
| R2                                             | 1 (1%)            | 1 (2%)            | -                  |                       |
| Lymphovascular invasion, n (%)                 |                   |                   |                    |                       |
| Negative                                       | 38 (38%)          | 11 (24%)          | 27 (50%)           | 0.01                  |
| Positive                                       | 61 (62%)          | 34 (76%)          | 27 (50%)           |                       |
| Unknown                                        | 5                 | 1                 | 4                  |                       |
| Perineural invasion, n (%)                     |                   |                   |                    |                       |
| Negative                                       | 12 (12%)          | 3 (7%)            | 9 (16%)            | 0.22                  |
| Positive                                       | 90 (88%)          | 42 (93%)          | 48 (84%)           |                       |
| Unknown                                        | 2                 | 1                 | 1                  |                       |
| Adjuvant treatment, n (%)                      |                   |                   |                    |                       |
| None                                           | 12 (11%)          | 5 (11%)           | 7 (12%)            | 0.50                  |
| Chemotherapy only                              | 32 (31%)          | 17 (37%)          | 15 (26%)           |                       |
| Radiation or chemoradiation only               | 10 (10%)          | 4 (9%)            | 6 (10%)            |                       |
| Chemoradiation and chemotherapy                | 42 (40%)          | 15 (32%)          | 27 (47%)           |                       |
| Other/Unknown                                  | 8 (8%)            | 5 (11%)           | 3 (5%)             |                       |
| SMAD4, n (%)                                   |                   |                   |                    |                       |
| Lost                                           | 56 (54%)          | 29 (63%)          | 27 (47%)           | 0.11                  |
| Intact                                         | 48 (46%)          | 17 (37%)          | 31 (53%)           |                       |
| KRAS, n (%)                                    |                   |                   |                    |                       |
| Wild-type                                      | 6 (7.5%)          | 0                 | 6 (10%)            | 0.18                  |
| Mutant                                         | 74 (92.5%)        | 22 (100%)         | 52 (90%)           |                       |
| Unknown                                        | 24                | 24                | 0                  |                       |
| TP53, n (%)                                    |                   |                   |                    |                       |
| Wild-type                                      | 28 (36%)          | 5 (23%)           | 23 (41%)           | 0.19                  |
| Altered                                        | 50 (64%)          | 17 (77%)          | 33 (59%)           |                       |
| Unknown                                        | 26                | 24                | 2                  |                       |
| CDKN2A, n (%)                                  |                   |                   |                    |                       |
| Intact                                         | 51 (65%)          | 16 (73%)          | 35 (62.5%)         | 0.44                  |
| Lost                                           | 27 (35%)          | 6 (27%)           | 21 (37.5%)         |                       |
| Unknown                                        | 26                | 24                | 2                  |                       |

<sup>a</sup> *P* value for Fisher's exact test for categorical variables and Wilcoxon rank-sum test for continuous variables.

<sup>b</sup> Among 98/104 patients with available tumor size data.

Abbreviations: OHSU, Oregon Health & Science University; DF/BWCC, Dana-Farber/Brigham and Women's Cancer Center; Q1, 25<sup>th</sup> percentile; Q3, 75<sup>th</sup>

**Supplementary Table S2.** Baseline characteristics of presurgically-treated patients with resected PDAC

|                                                               | <b>OHSU (Cohort 1)</b> |
|---------------------------------------------------------------|------------------------|
| Number of subjects                                            | 13                     |
| Women, n (%)                                                  | 4 (31%)                |
| Age in years, median (Q1, Q3)                                 | 61.0 (56.0, 69.0)      |
| Tumor location, n (%)                                         |                        |
| Head/Uncinate                                                 | 10 (77%)               |
| Body/Tail                                                     | 3 (23%)                |
| Tumor size in cm, median (Q1, Q3) <sup>a</sup>                | 3.8 (2.9, 4.4)         |
| AJCC 8 <sup>th</sup> ed. pT stage, n (%)                      |                        |
| T1                                                            | 3 (23%)                |
| T2                                                            | 3 (23%)                |
| T3                                                            | 5 (38%)                |
| T4                                                            | 2 (15%)                |
| AJCC 8 <sup>th</sup> ed. pN stage, n (%)                      |                        |
| N0                                                            | 7 (54%)                |
| N1                                                            | 4 (31%)                |
| N2                                                            | 2 (15%)                |
| Tumor differentiation, n (%)                                  |                        |
| Well/Moderately differentiated                                | 4 (31%)                |
| Poorly differentiated/Undifferentiated                        | 6 (46%)                |
| Unknown                                                       | 3 (23%)                |
| Resection margin status, n (%)                                |                        |
| R0                                                            | 5 (38%)                |
| R1                                                            | 7 (54%)                |
| R2                                                            | 1 (8%)                 |
| Lymphovascular invasion, n (%)                                |                        |
| Negative                                                      | 7 (54%)                |
| Positive                                                      | 6 (46%)                |
| Perineural invasion, n (%)                                    |                        |
| Negative                                                      | 0 (0%)                 |
| Positive                                                      | 13 (100%)              |
| Presurgical treatment, n (%)                                  |                        |
| Chemotherapy only                                             | 6 (46%)                |
| Radiation or chemoradiation only                              | 1 (8%)                 |
| (Chemo)radiation and chemotherapy                             | 6 (46%)                |
| Unknown                                                       | 0                      |
| Presurgical chemotherapy agent, n (%)                         |                        |
| FOLFIRINOX                                                    | 3 (23%)                |
| Gemcitabine/nab-paclitaxel                                    | 7 (54%)                |
| Other combination                                             | 3 (23%)                |
| Unknown                                                       | 0 (0%)                 |
| Presurgical chemoradiation agent, n (%)                       |                        |
| No concurrent chemoradiotherapy                               | 9 (69%)                |
| Gemcitabine/nab-paclitaxel                                    | 1 (8%)                 |
| 5-FU or capecitabine                                          | 3 (23%)                |
| Histologic response to presurgical/neoadjuvant therapy, n (%) |                        |
| Poor or no response                                           | 3 (23%)                |
| Moderate response                                             | 3 (23%)                |
| Marked response (minimal residual disease)                    | 6 (46%)                |
| Unknown                                                       | 1 (8%)                 |
| Adjuvant treatment, n (%)                                     |                        |
| None                                                          | 6 (46%)                |
| Chemotherapy only                                             | 5 (38%)                |
| Radiation or chemoradiation only                              | 0 (0%)                 |
| Chemoradiation and chemotherapy                               | 0 (0%)                 |
| Other/Unknown                                                 | 2 (15%)                |

<sup>a</sup>Among 11/13 patients with available tumor size data

Abbreviations: Q1, 25<sup>th</sup> percentile; Q3, 75<sup>th</sup> percentile; AJCC, American Joint Committee on Cancer

**Supplementary Table S3.** Characteristics of pancreatic primary tumors and distant metastases from Cohort 3

|                                                       | <b>PICI (Cohort 3)<sup>a</sup></b> |
|-------------------------------------------------------|------------------------------------|
| Number of subjects                                    | 18                                 |
| Women, n (%)                                          | 8 (44%)                            |
| Age in years, median (Q1, Q3)                         | 65 (60, 69)                        |
| Primary tumor location, n (%)                         |                                    |
| Head/Uncinate                                         | 56%                                |
| Body/Tail                                             | 44%                                |
| AJCC 8 <sup>th</sup> ed. pM stage, n (%) <sup>b</sup> |                                    |
| M0                                                    | 10                                 |
| M1                                                    | 8                                  |
| Tissue site, specimen type                            |                                    |
| Pancreas, biopsy                                      | 3                                  |
| Pancreas, surgical resection                          | 6                                  |
| Liver, biopsy                                         | 7                                  |
| Lung, biopsy                                          | 1                                  |
| Peritoneum, biopsy                                    | 1                                  |
| Cancer treatment prior to specimen collection, n (%)  |                                    |
| None                                                  | 16                                 |
| Chemotherapy only                                     | 0                                  |
| Radiation or chemoradiation only                      | 0                                  |
| Chemoradiation and chemotherapy                       | 2                                  |

<sup>a</sup>Patients within this cohort were treated at multiple institutions participating in the PRINCE clinical trial (NCT03214250). Tissues evaluated herein are pre-study baseline tissues.

<sup>b</sup>pM staging at time of initial PDAC diagnosis.

Pancreatic biopsies (n = 3) are from patients with Stage IV disease; pancreatic surgical resections are from different patients (n = 6) with Stage II disease at time of tissue collection. Liver, lung, and peritoneum biopsies (n = 9 total) are confirmed metastatic PDAC and are not matched to primary pancreatic tumors in this cohort.

Abbreviations: PICI, Parker Institute for Cancer Immunotherapy; Q1, 25<sup>th</sup> percentile; Q3, 75<sup>th</sup> percentile; AJCC, American Joint Committee on Cancer

## Supplementary Table S4. mIHC Antibody Panels

### Myeloid Panel

|                  | Pre-AR             | Cycle 1        | Cycle 2               | Cycle 3           | Cycle 4         | Cycle 5                | Cycle 6         | Cycle 7      |
|------------------|--------------------|----------------|-----------------------|-------------------|-----------------|------------------------|-----------------|--------------|
| Primary Antibody | <b>Hematoxylin</b> | <b>CD68</b>    | <b>DC-SIGN</b>        | <b>DC-LAMP</b>    | <b>CD45</b>     | <b>CD66b</b>           | <b>HLA-DPB1</b> | <b>CD163</b> |
| RRID             | N/A                | AB_306119      | AB_1121347            | AB_2827532        | AB_467274       | AB_396066              | AB_2827533      | AB_10982556  |
| Clone            | N/A                | PG-M1          | DC-28                 | 1010E1.01         | HI30            | G10F5                  | EPR11226        | 10D6         |
| Vendor           | Dako               | Abcam          | Santa Cruz            | Novus Biologicals | ThermoFisher    | BD Biosciences         | Abcam           | ThermoFisher |
| Catalog #        | S3301              | ab783          | sc-65740              | DDX0191P-100      | 14-0459-82      | 555723                 | ab157210        | MA5-11458    |
| Concentration    | N/A                | 1:50           | 1:100                 | 1:100             | 1:100           | 1:200                  | 1:20,000        | 1:100        |
| Incubation       | 1 min @ RT         | 30 min @ RT    | 30 min @ RT           | 30 min @ RT       | 60 min @ RT     | O/N @ 4°C              | 30 min @ RT     | 30 min @ RT  |
|                  |                    | <b>Cycle 8</b> | <b>Cycle 9</b>        | <b>Cycle 10</b>   | <b>Cycle 11</b> | <b>Cycle 12</b>        |                 |              |
| Primary Antibody |                    | <b>PD-L1</b>   | <b>CD3/CD20/NKp46</b> | <b>Tryptase</b>   | <b>αSMA</b>     | <b>Pan Cytokeratin</b> |                 |              |
| RRID             |                    | AB_2687655     | see footnote          | AB_303023         | AB_2223021      | AB_777047              |                 |              |
| Clone            |                    | E1L3N          | see footnote          | AA1               | Polyclonal      | AE1/AE3                |                 |              |
| Vendor           |                    | Cell Signaling | see footnote          | Abcam             | Abcam           | Abcam                  |                 |              |
| Catalog #        |                    | 13684S         | see footnote          | ab2378            | ab5694          | ab27988                |                 |              |
| Concentration    |                    | 1:100          | see footnote          | 1:20,000          | 1:200           | 1:2000                 |                 |              |
| Incubation       |                    | O/N @ 4°C      | 30 min @ RT           | 30 min @ RT       | 30 min @ RT     | 30 min @ RT            |                 |              |

### Lymphoid Panel

|                  | Pre-AR             | Cycle 1        | Cycle 2        | Cycle 3         | Cycle 4         | Cycle 5         | Cycle 6         | Cycle 7                |
|------------------|--------------------|----------------|----------------|-----------------|-----------------|-----------------|-----------------|------------------------|
| Primary Antibody | <b>Hematoxylin</b> | <b>PD-1</b>    | <b>CD3</b>     | <b>RORγt</b>    | <b>NKp46</b>    | <b>CD45</b>     | <b>CD8α</b>     | <b>T-bet</b>           |
| RRID             | N/A                | AB_881954      | AB_149922      | AB_11205416     | AB_2149153      | AB_467274       | AB_11000353     | AB_2616022             |
| Clone            | N/A                | NAT105         | SP7            | 6F3.1           | 195314          | HI30            | C8/144B         | D6N8B                  |
| Vendor           | Dako               | Abcam          | ThermoFisher   | Millipore Sigma | R&D Systems     | ThermoFisher    | ThermoFisher    | Cell Signaling         |
| Catalog #        | S3301              | ab52587        | RM-9107-S      | MABF81          | MAB1850         | 14-0459-82      | MA5-13473       | 13232S                 |
| Concentration    | N/A                | 1:50           | 1:150          | 1:200           | 1:20            | 1:100           | 1:100           | 1:500                  |
| Incubation       | 1 min @ RT         | 30 min @ RT    | 30 min @ RT    | 30 min @ RT     | 30 min @ RT     | 60 min @ RT     | 30 min @ RT     | O/N @ 4°C              |
|                  |                    | <b>Cycle 8</b> | <b>Cycle 9</b> | <b>Cycle 10</b> | <b>Cycle 11</b> | <b>Cycle 12</b> | <b>Cycle 13</b> | <b>Cycle 14</b>        |
| Primary Antibody |                    | <b>GATA3</b>   | <b>PD-L1</b>   | <b>Foxp3</b>    | <b>CD20</b>     | <b>Smad4</b>    | <b>αSMA</b>     | <b>Pan Cytokeratin</b> |
| RRID             |                    | AB_10895444    | AB_2687655     | AB_467556       | AB_1139386      | AB_627905       | AB_2223021      | AB_777047              |
| Clone            |                    | L50-823        | E1L3N          | 236A/E7         | SP32            | B-8             | Polyclonal      | AE1/AE3                |
| Vendor           |                    | BioCare        | Cell Signaling | ThermoFisher    | Abcam           | Santa Cruz      | Abcam           | Abcam                  |
| Catalog #        |                    | CM405A         | 13684S         | 14-4777-82      | ab64088         | sc-7966         | ab5694          | ab27988                |
| Concentration    |                    | 1:50           | 1:100          | 1:40            | 1:1000          | 1:50            | 1:200           | 1:2000                 |
| Incubation       |                    | O/N @ 4°C      | O/N @ 4°C      | 30 min @ RT     | 60 min @ RT     | O/N @ 4°C       | 30 min @ RT     | 30 min @ RT            |

### Functional Panel

|                  | Pre-AR             | Cycle 1             | Cycle 2        | Cycle 3         | Cycle 4                | Cycle 5               | Cycle 6             | Cycle 7           |
|------------------|--------------------|---------------------|----------------|-----------------|------------------------|-----------------------|---------------------|-------------------|
|                  | Round 1            | Round 1             | Round 1        | Round 1         | Round 1                | Round 1               | Round 1             | Round 1           |
| Primary Antibody | <b>Hematoxylin</b> | <b>PD-1</b>         | <b>CD138</b>   | <b>CD68</b>     | <b>CD38</b>            | <b>CD45</b>           | <b>IDO</b>          | <b>CD8α</b>       |
| RRID             | N/A                | AB_881954           | AB_10987019    | AB_306119       | AB_10986743            | AB_467274             | AB_1977068          | AB_11000353       |
| Clone            | N/A                | NAT105              | MI15           | PG-M1           | 38C03 (SPC32)          | HI30                  | 1F8.2               | C8/144B           |
| Vendor           | Dako               | Abcam               | ThermoFisher   | Abcam           | ThermoFisher           | ThermoFisher          | Millipore Sigma     | ThermoFisher      |
| Catalog #        | S3301              | ab52587             | MA5-12400      | ab783           | MA5-14413              | 14-0459-82            | MAB10009            | MA5-13473         |
| Concentration    | N/A                | 1:50                | 1:200          | 1:50            | 1:100                  | 1:100                 | 1:100               | 1:100             |
| Incubation       | 1 min @ RT         | 30 min @ RT         | 30 min @ RT    | 30 min @ RT     | 30 min @ RT            | 60 min @ RT           | 30 min @ RT         | 30 min @ RT       |
|                  |                    | Round 2             | Round 2        | Round 2         | Round 2                | Round 2               | Round 2             | Round 2           |
| Primary Antibody |                    | <b>PD-L1</b>        | <b>CD4</b>     | <b>CD3</b>      | <b>T-bet</b>           | <b>Granzyme B</b>     | <b>CD278 (ICOS)</b> | <b>CD27</b>       |
| RRID             |                    | AB_2687655          | AB_2335982     | AB_149922       | AB_2616022             | AB_304251             | AB_2827535          | AB_2827537        |
| Clone            |                    | E1L3N               | SP35           | SP7             | D6N8B                  | Polyclonal            | SP98                | Polyclonal        |
| Vendor           |                    | Cell Signaling      | Ventana        | ThermoFisher    | Cell Signaling         | Abcam                 | LifeSpan Bio        | Novus Biologicals |
| Catalog #        |                    | 13684S              | 790-4423       | RM-9107-S       | 13232S                 | ab4059                | LS-C210350-500      | NBP2-38434        |
| Concentration    |                    | 1:100               | 1:4            | 1:500           | 1:500                  | 1:200                 | 1:100               | 1:500             |
| Incubation       |                    | O/N @ 4°C           | 30 min @ RT    | 30 min @ RT     | O/N @ 4°C              | 30 min @ RT           | 30 min @ RT         | 30 min @ RT       |
|                  |                    | <b>Cycle 8</b>      | <b>Cycle 9</b> | <b>Cycle 10</b> | <b>Cycle 11</b>        | <b>Cycle 12</b>       |                     |                   |
| Primary Antibody |                    | Round 1             | Round 1        | Round 1         | Round 1                | Round 1               |                     |                   |
| RRID             |                    | <b>CD5</b>          | <b>IgD</b>     | <b>CD20</b>     | <b>Pan Cytokeratin</b> | <b>PNAd (MECA-79)</b> |                     |                   |
| Clone            |                    | AB_10985112         | AB_10974228    | AB_1139386      | AB_777047              | AB_395099             |                     |                   |
| Vendor           |                    | 4C7                 | EPR6146        | SP32            | AE1/AE3                | MECA-79               |                     |                   |
| Catalog #        |                    | ThermoFisher        | Abcam          | Abcam           | Abcam                  | BD Biosciences        |                     |                   |
| Concentration    |                    | MA5-13308           | ab124795       | ab64088         | ab27988                | 553863                |                     |                   |
| Incubation       |                    | 1:40                | 1:200          | 1:1000          | 1:2000                 | 1:500                 |                     |                   |
|                  |                    | Round 2             | Round 2        | Round 2         | Round 2                | Round 2               |                     |                   |
| Primary Antibody |                    | <b>EOMES (Thr2)</b> | ---            | ---             | <b>Ki67</b>            | ---                   |                     |                   |
| RRID             |                    | AB_10806889         |                |                 | AB_1158031             |                       |                     |                   |
| Clone            |                    | Polyclonal          |                |                 | SP6                    |                       |                     |                   |
| Vendor           |                    | Millipore Sigma     |                |                 | Millipore Sigma        |                       |                     |                   |
| Catalog #        |                    | AB2283              |                |                 | 275R-14                |                       |                     |                   |
| Concentration    |                    | 1:1000              |                |                 | 1:500                  |                       |                     |                   |
| Incubation       |                    | 30 min @ RT         |                |                 | 30 min @ RT            |                       |                     |                   |

a. In Myeloid panel Cycle 9, antibodies were applied simultaneously in a cocktail. CD3 (Clone SP7, ThermoFisher RM-9107-S, 1:150),

CD20 (Clone: SP32, Abcam ab64088, 1:1000), NKp46 (Clone 195314, R&D Systems MAB1850, 1:20)

Abbreviations: AR, antigen retrieval; RRID, Research Resource Identifier; αSMA, alpha smooth muscle actin

**Supplementary Table S5.** Summary of tissue area analyzed, median cell counts, and median cell densities across histopathological regions

|                                                           | <b>Tumor (T)</b>    | <b>Tumor Adjacent Stroma (TAS)</b> | <b>Tumor Adjacent Normal (AN)</b> | <b>Tertiary Lymphoid Structure (TLS)<sup>a</sup></b> | <b>Healthy Normal Pancreas (HN)</b> |
|-----------------------------------------------------------|---------------------|------------------------------------|-----------------------------------|------------------------------------------------------|-------------------------------------|
| <b>Total # ROIs Analyzed</b>                              | 407                 | 162                                | 50                                | 173                                                  | 18                                  |
| <b>Avg. Area Analyzed per Specimen (mm<sup>2</sup>)</b>   | 20.2                | 8.8                                | 3.2                               | 0.7                                                  | 11.1                                |
| <b>Cell Counts per Patient, Median (IQR)</b>              |                     |                                    |                                   |                                                      |                                     |
| PanCK <sup>+</sup>                                        | 22883 (11938-33497) | 3255 (1066-8450)                   | 4532 (2193-7366)                  | 25 (4-80)                                            | 20285 (16323-24624)                 |
| CD8 <sup>+</sup> T cell                                   | 1192 (469-2682)     | 979 (388-1973)                     | 207 (95-445)                      | 576 (300-1317)                                       | 599 (330-724)                       |
| Th0 T cell                                                | 1356 (477-3019)     | 684 (371-1604)                     | 100 (44-184)                      | 624 (278-1345)                                       | 91 (79-206)                         |
| Th1 T cell                                                | 50 (14-115)         | 27 (8-71)                          | 4 (2-9)                           | 17 (3-39)                                            | 7 (4-9)                             |
| Th2 T cell                                                | 110 (36-291)        | 103 (27-301)                       | 13 (2-25)                         | 201 (45-551)                                         | 1 (0-3)                             |
| Th17 T cell                                               | 16 (6-62)           | 7 (2-24)                           | 2 (0-4)                           | 3 (1-12)                                             | 7 (3-11)                            |
| Treg                                                      | 288 (86-576)        | 119 (47-296)                       | 9 (3-31)                          | 48 (21-113)                                          | 2 (1-5)                             |
| CD20 <sup>+</sup> B cell                                  | 344 (120-795)       | 252 (81-500)                       | 34 (11-76)                        | 1857 (721-3850)                                      | 13 (3-42)                           |
| Plasma cell                                               | 11 (1-70)           | 3 (1-12)                           | 0 (0-2)                           | 1 (0-3)                                              | not evaluated                       |
| Plasmablast                                               | 54 (12-234)         | 26 (11-72)                         | 5 (0-9)                           | 2 (0-8)                                              | not evaluated                       |
| Mast cell                                                 | 337 (143-829)       | 216 (97-454)                       | 171 (64-324)                      | 13 (5-27)                                            | 154 (90-177)                        |
| Neutrophil/Eosinophil                                     | 754 (265-2647)      | 257 (109-953)                      | 379 (145-913)                     | 13 (5-33)                                            | 68 (27-97)                          |
| DC-LAMP <sup>+</sup> DC                                   | 27 (12-56)          | 15 (5-29)                          | 15 (5-43)                         | 16 (4-43)                                            | 1 (0-2)                             |
| DC-LAMP <sup>-</sup> DC                                   | 1062 (305-2585)     | 686 (287-1559)                     | 591 (181-1408)                    | 81 (10-224)                                          | 9 (4-23)                            |
| CD163 <sup>+</sup> Mono/Macrophage                        | 996 (437-2367)      | 476 (167-1184)                     | 350 (101-857)                     | 19 (8-52)                                            | 1053 (889-1184)                     |
| CD163 <sup>-</sup> Mono/Macrophage                        | 676 (315-1570)      | 190 (95-515)                       | 212 (100-485)                     | 10 (4-26)                                            | 111 (37-204)                        |
| <b>Cell Density<sup>b</sup> per Patient, Median (IQR)</b> |                     |                                    |                                   |                                                      |                                     |
| PanCK <sup>+</sup>                                        | 995 (660-1526)      | 391 (210-841)                      | 1645 (1150-2061)                  | 41 (16-111)                                          | 1873 (1717-1940)                    |
| CD8 <sup>+</sup> T cell                                   | 76 (31-142)         | 131 (66-240)                       | 83 (43-128)                       | 1250 (896-2435)                                      | 40 (28-47)                          |
| Th0 T cell                                                | 77 (34-134)         | 99 (48-165)                        | 29 (17-58)                        | 1111 (634-1927)                                      | 11 (7-16)                           |
| Th1 T cell                                                | 3 (1-6)             | 4 (1-9)                            | 2 (1-2)                           | 28 (9-79)                                            | 1 (0-1)                             |
| Th2 T cell                                                | 7 (2-18)            | 14 (4-35)                          | 4 (1-9)                           | 474 (165-814)                                        | 0 (0-0)                             |
| Th17 T cell                                               | 1 (0-4)             | 1 (0-2)                            | 1 (0-2)                           | 6 (1-19)                                             | 1 (0-1)                             |
| Treg                                                      | 14 (5-26)           | 17 (7-32)                          | 4 (1-7)                           | 104 (52-195)                                         | 0 (0-0)                             |
| CD20 <sup>+</sup> B cell                                  | 21 (8-42)           | 28 (14-52)                         | 10 (6-19)                         | 4230 (3069-5202)                                     | 1 (0-5)                             |
| Plasma cell                                               | 2 (0-10)            | 0 (0-2)                            | 0 (0-1)                           | 0 (0-5)                                              | not evaluated                       |
| Plasmablast                                               | 2 (0-7)             | 3 (1-9)                            | 1 (0-3)                           | 4 (0-11)                                             | not evaluated                       |
| Mast cell                                                 | 21 (10-42)          | 28 (18-49)                         | 18 (6-25)                         | 21 (11-53)                                           | 11 (9-13)                           |
| Neutrophil/Eosinophil                                     | 49 (17-149)         | 49 (13-121)                        | 13 (8-24)                         | 25 (11-56)                                           | 5 (2-11)                            |
| DC-LAMP <sup>+</sup> DC                                   | 1 (1-4)             | 2 (1-4)                            | 1 (1-6)                           | 33 (16-65)                                           | 0 (0-0)                             |
| DC-LAMP <sup>-</sup> DC                                   | 69 (21-161)         | 99 (44-180)                        | 64 (21-149)                       | 129 (29-513)                                         | 1 (0-2)                             |
| CD163 <sup>+</sup> Mono/Macrophage                        | 61 (26-118)         | 63 (27-119)                        | 25 (9-73)                         | 49 (17-112)                                          | 78 (73-92)                          |
| CD163 <sup>-</sup> Mono/Macrophage                        | 39 (20-68)          | 26 (14-54)                         | 15 (6-40)                         | 24 (11-53)                                           | 10 (6-17)                           |

<sup>a</sup>TLS data included here reflect the subset TLS ROIs fully analyzed in all mIHC panels. See Materials & Methods for additional detail.

<sup>b</sup>Cell density reported as cells per mm<sup>2</sup>

Abbreviations: IQR, interquartile range

**Supplementary Table S6.** Overview of individual ROIs analyzed from PDACs in Cohorts 1 and 2, by histopathology type and location

|                                                     | <b>Histopathology Type</b>               |                                          |                                        |                                          |                                        |                                        |
|-----------------------------------------------------|------------------------------------------|------------------------------------------|----------------------------------------|------------------------------------------|----------------------------------------|----------------------------------------|
|                                                     | <b>Tumor (T)</b>                         | <b>Tumor Adjacent Stroma (TAS)</b>       | <b>Adjacent Normal (AN)</b>            | <b>Tertiary Lymphoid Structure (TLS)</b> | <b>Lymph Node (LN)</b>                 | <b>Dysplasia</b>                       |
| <b>Location<sup>a</sup>: Intratumoral</b>           | 312 (Tx Naïve)<br>40 (PST)               | 0 (Tx Naïve)<br>0 (PST)                  | 0 (Tx Naïve)<br>0 (PST)                | 67 (Tx Naïve)<br>1 (PST)                 | 2 (Tx Naïve)*<br>0 (PST)               | 6 (Tx Naïve)*<br>0 (PST)               |
| <b>Location: Border</b>                             | ----                                     | 38 (Tx Naïve)<br>5 (PST)                 | ----                                   | 46 (Tx Naïve)<br>4 (PST)                 | 1 (Tx Naïve)<br>0 (PST)                | 8 (Tx Naïve)<br>0 (PST)                |
| <b>Location: Spanning Border-Distal</b>             | ----                                     | 26 (Tx Naïve)<br>4 (PST)                 | 2 (Tx Naïve)<br>0 (PST)                | 1 (Tx Naïve)<br>2 (PST)                  | ----                                   | ----                                   |
| <b>Location: Distal</b>                             | ----                                     | 72 (Tx Naïve)<br>16 (PST)                | 42 (Tx Naïve)<br>3 (PST)               | 42 (Tx Naïve)<br>11 (PST)                | 26 (Tx Naïve)<br>2 (PST)               | 14 (Tx Naïve)<br>0 (PST)               |
| <b>Total ROIs Analyzed (by Histopathology Type)</b> | <b>312</b> (Tx Naïve)<br><b>40</b> (PST) | <b>136</b> (Tx Naïve)<br><b>25</b> (PST) | <b>44</b> (Tx Naïve)<br><b>3</b> (PST) | <b>156</b> (Tx Naïve)<br><b>18</b> (PST) | <b>29</b> (Tx Naïve)<br><b>2</b> (PST) | <b>28</b> (Tx Naïve)<br><b>0</b> (PST) |

<sup>a</sup> Definitions of location categories are provided in Figure 2 and Materials & Methods. Table contents relate to data presented in Figure 2E-G, Figure 7E<sup>#</sup>, and Supplementary Figure S7E<sup>#</sup>.

\* These ROIs were annotated by a pathologist to be surrounded by invasive carcinoma and fell within broader. “Tumor” pathology annotations, thereby leading to their location classification as Intratumoral

<sup>#</sup>Indicated figures do not incorporate data from LN or Dysplasia ROIs, as these histopathology types were scarce or absent in PST tissue specimens.

Abbreviations: ROI, region of interest; Tx, treatment; PST, presurgically treated

**Supplementary Table S7.** Correlations between intratumoral leukocyte density, tumor characteristics, and survival

|                                               | Leukocyte Density (Tumor)                            |                                                       |                                                        | <i>P</i> <sup>a</sup> |
|-----------------------------------------------|------------------------------------------------------|-------------------------------------------------------|--------------------------------------------------------|-----------------------|
|                                               | Tertile 1<br>(32-438<br>leukocytes/mm <sup>2</sup> ) | Tertile 2<br>(441-727<br>leukocytes/mm <sup>2</sup> ) | Tertile 3<br>(733-2576<br>leukocytes/mm <sup>2</sup> ) |                       |
| AJCC 8th ed. pT stage, n (%)                  |                                                      |                                                       |                                                        | 0.49                  |
| T1 (n=11)                                     | 2                                                    | 5                                                     | 4                                                      |                       |
| T2 (n=62)                                     | 19                                                   | 23                                                    | 20                                                     |                       |
| T3 (n=23)                                     | 10                                                   | 6                                                     | 7                                                      |                       |
| T4 (n=2)                                      | 2                                                    | 0                                                     | 0                                                      |                       |
| AJCC 8th ed. pN stage, n (%)                  |                                                      |                                                       |                                                        | 0.97                  |
| N0 (n=28)                                     | 9                                                    | 10                                                    | 9                                                      |                       |
| N1 (n=38)                                     | 11                                                   | 13                                                    | 14                                                     |                       |
| N2 (n=38)                                     | 14                                                   | 12                                                    | 12                                                     |                       |
| Tumor differentiation, n (%)                  |                                                      |                                                       |                                                        | 0.80                  |
| Well/Moderately differentiated (n=53)         | 17                                                   | 20                                                    | 16                                                     |                       |
| Poorly differentiated/Undifferentiated (n=48) | 17                                                   | 15                                                    | 16                                                     |                       |
| Lymphovascular invasion, n (%)                |                                                      |                                                       |                                                        | 0.84                  |
| Negative (n=38)                               | 13                                                   | 13                                                    | 12                                                     |                       |
| Positive (n=60)                               | 17                                                   | 21                                                    | 22                                                     |                       |
|                                               |                                                      |                                                       |                                                        |                       |
| OS                                            |                                                      |                                                       |                                                        | 0.49                  |
| No. patients/No. event                        | 34/33                                                | 35/28                                                 | 35/31                                                  |                       |
| Median survival, months                       | 20.4                                                 | 22.1                                                  | 23.1                                                   |                       |
|                                               |                                                      |                                                       |                                                        |                       |
| DFS                                           |                                                      |                                                       |                                                        | 0.28                  |
| No. patients/No. event                        | 34/30                                                | 35/25                                                 | 35/31                                                  |                       |
| Median survival, months                       | 11.1                                                 | 14.3                                                  | 10.9                                                   |                       |

<sup>a</sup>*P* value for Fisher's exact test for categorical variables and for log-rank test for OS and DFS.

Data reported within table is from treatment-naïve PDACs from Cohorts 1 and 2.

**Supplementary Table S8.** Correlations between tumor adjacent stroma (TAS) leukocyte density, tumor characteristics, and survival

|                                               | <b>Leukocyte Density (TAS)</b>                            |                                                            |                                                             | <b>P<sup>a</sup></b> |
|-----------------------------------------------|-----------------------------------------------------------|------------------------------------------------------------|-------------------------------------------------------------|----------------------|
|                                               | <b>Tertile 1</b><br>(162-562 leukocytes/mm <sup>2</sup> ) | <b>Tertile 2</b><br>(572-1077 leukocytes/mm <sup>2</sup> ) | <b>Tertile 3</b><br>(1095-3116 leukocytes/mm <sup>2</sup> ) |                      |
| AJCC 8th ed. pT stage, n (%)                  |                                                           |                                                            |                                                             | 0.22                 |
| T1 (n=9)                                      | 1                                                         | 4                                                          | 4                                                           |                      |
| T2 (n=49)                                     | 17                                                        | 14                                                         | 18                                                          |                      |
| T3 (n=17)                                     | 6                                                         | 8                                                          | 3                                                           |                      |
| T4 (n=2)                                      | 2                                                         | 0                                                          | 0                                                           |                      |
| AJCC 8th ed. pN stage, n (%)                  |                                                           |                                                            |                                                             | 1.00                 |
| N0 (n=23)                                     | 7                                                         | 8                                                          | 8                                                           |                      |
| N1 (n=31)                                     | 11                                                        | 10                                                         | 10                                                          |                      |
| N2 (n=27)                                     | 9                                                         | 9                                                          | 9                                                           |                      |
| Tumor differentiation, n (%)                  |                                                           |                                                            |                                                             | 0.16                 |
| Well/Moderately differentiated (n=46)         | 12                                                        | 19                                                         | 15                                                          |                      |
| Poorly differentiated/Undifferentiated (n=34) | 15                                                        | 8                                                          | 11                                                          |                      |
| Lymphovascular invasion, n (%)                |                                                           |                                                            |                                                             | 1.00                 |
| Negative (n=32)                               | 11                                                        | 11                                                         | 10                                                          |                      |
| Positive (n=47)                               | 15                                                        | 16                                                         | 16                                                          |                      |
| OS                                            |                                                           |                                                            |                                                             | 0.80                 |
| No. patients/No. event                        | 27/24                                                     | 27/24                                                      | 27/24                                                       |                      |
| Median survival, months                       | 21.2                                                      | 19.1                                                       | 23.1                                                        |                      |
| DFS                                           |                                                           |                                                            |                                                             | 0.98                 |
| No. patients/No. event                        | 27/22                                                     | 27/20                                                      | 27/24                                                       |                      |
| Median survival, months                       | 13.7                                                      | 14.3                                                       | 13.6                                                        |                      |

<sup>a</sup>P value for Fisher's exact test for categorical variables and for log-rank test for OS and DFS.

Data reported within table is from treatment-naïve PDACs from Cohorts 1 and 2.

**Supplementary Table S9.** Correlations between tumor cluster<sup>a</sup>, tumor characteristics, and survival

|                                               | Tumor Cluster |         |          | <i>P</i> <sup>b</sup> |
|-----------------------------------------------|---------------|---------|----------|-----------------------|
|                                               | Mixed         | Myeloid | Lymphoid |                       |
| AJCC 8th ed. pT stage, n (%)                  |               |         |          | 0.60                  |
| T1 (n=11)                                     | 4             | 5       | 2        |                       |
| T2 (n=62)                                     | 25            | 20      | 17       |                       |
| T3 (n=23)                                     | 9             | 5       | 9        |                       |
| T4 (n=2)                                      | 2             | 0       | 0        |                       |
| AJCC 8th ed. pN stage, n (%)                  |               |         |          | 0.82                  |
| N0 (n=28)                                     | 11            | 10      | 7        |                       |
| N1 (n=38)                                     | 14            | 11      | 13       |                       |
| N2 (n=38)                                     | 17            | 9       | 12       |                       |
| Tumor differentiation, n (%)                  |               |         |          | 0.15                  |
| Well/Moderately differentiated (n=53)         | 18            | 20      | 15       |                       |
| Poorly differentiated/Undifferentiated (n=48) | 23            | 10      | 15       |                       |
| Lymphovascular invasion, n (%)                |               |         |          | 0.14                  |
| Negative (n=38)                               | 12            | 15      | 11       |                       |
| Positive (n=61)                               | 29            | 13      | 19       |                       |
| OS                                            |               |         |          | 0.20                  |
| No. patients/No. event                        | 42/38         | 30/25   | 32/29    |                       |
| Median survival, months                       | 20.1          | 22.6    | 21.0     |                       |
| DFS                                           |               |         |          | 0.94                  |
| No. patients/No. event                        | 42/32         | 30/25   | 32/29    |                       |
| Median survival, months                       | 11.5          | 10.9    | 13.0     |                       |

<sup>a</sup> Unsupervised hierarchical clustering of patients based on tumor immune composition in Figure 4

<sup>b</sup> *P* value for Fisher's exact test for categorical variables and for log-rank test for OS and DFS.

**Supplementary Table S10.** Correlation between tumor adjacent stroma cluster<sup>a</sup>, tumor characteristics, and survival

|                                               | TAS Cluster |         |          | <i>P</i> <sup>b</sup> |
|-----------------------------------------------|-------------|---------|----------|-----------------------|
|                                               | Mixed       | Myeloid | Lymphoid |                       |
| AJCC 8th ed. pT stage, n (%)                  |             |         |          | 0.30                  |
| T1 (n=9)                                      | 1           | 1       | 7        |                       |
| T2 (n=47)                                     | 12          | 17      | 18       |                       |
| T3 (n=18)                                     | 7           | 5       | 6        |                       |
| T4 (n=2)                                      | 0           | 1       | 1        |                       |
| AJCC 8th ed. pN stage, n (%)                  |             |         |          | 0.79                  |
| N0 (n=23)                                     | 5           | 7       | 11       |                       |
| N1 (n=31)                                     | 11          | 10      | 10       |                       |
| N2 (n=26)                                     | 7           | 8       | 11       |                       |
| Tumor differentiation, n (%)                  |             |         |          | 0.65                  |
| Well/Moderately differentiated (n=47)         | 15          | 14      | 18       |                       |
| Poorly differentiated/Undifferentiated (n=32) | 7           | 11      | 14       |                       |
| Lymphovascular invasion, n (%)                |             |         |          | 0.92                  |
| Negative (n=32)                               | 9           | 11      | 12       |                       |
| Positive (n=47)                               | 14          | 14      | 19       |                       |
|                                               |             |         |          |                       |
| OS                                            |             |         |          | 0.67                  |
| No. patients/No. event                        | 23/21       | 25/21   | 33/30    |                       |
| Median survival, months                       | 24.4        | 22.1    | 19.1     |                       |
|                                               |             |         |          |                       |
| DFS                                           |             |         |          | 0.17                  |
| No. patients/No. event                        | 23/22       | 25/17   | 33/28    |                       |
| Median survival, months                       | 13.8        | 15.9    | 10.2     |                       |

<sup>a</sup> Refers to unsupervised hierarchical clustering of patients based on stromal immune composition in Supplementary Figure S4

<sup>b</sup> *P* value for Fisher's exact test for categorical variables and for log-rank test for OS and DFS
