# Supplementary material
Source: PubMed Central journal article supplement (PMC8338775)
Supplement: NIHMS1686435-supplement-6.pdf [file NIHMS1686435-supplement-6.pdf]

**A**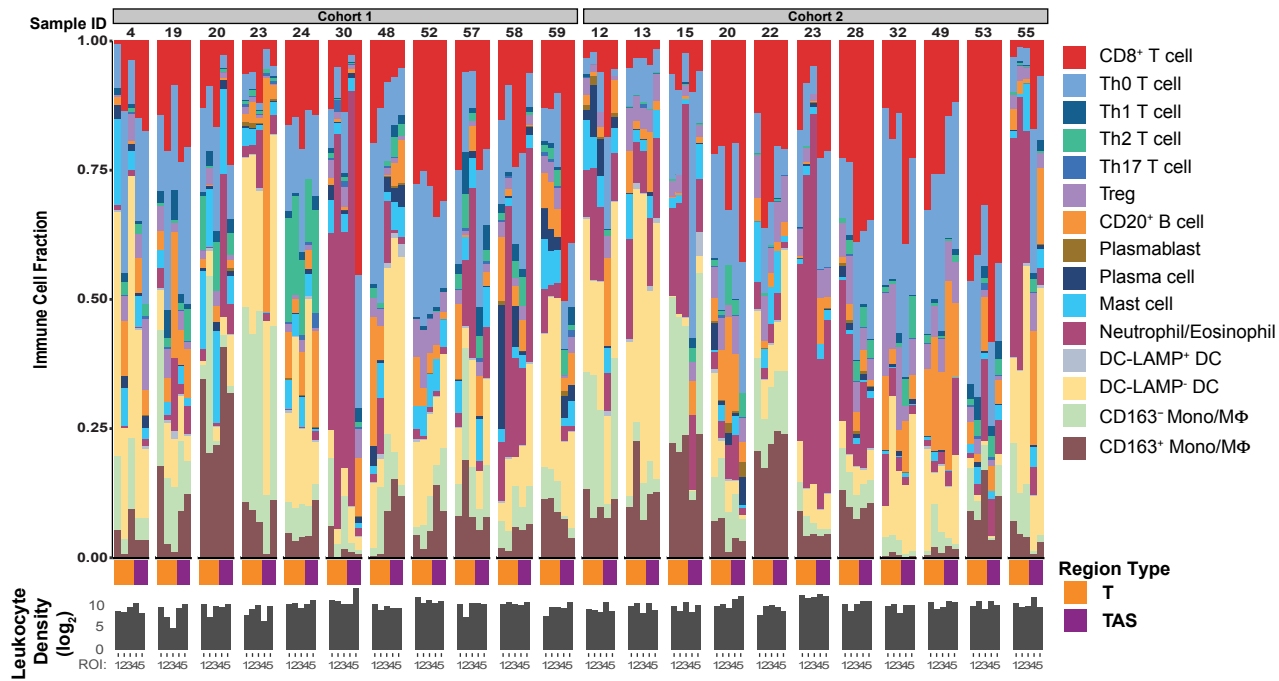**B**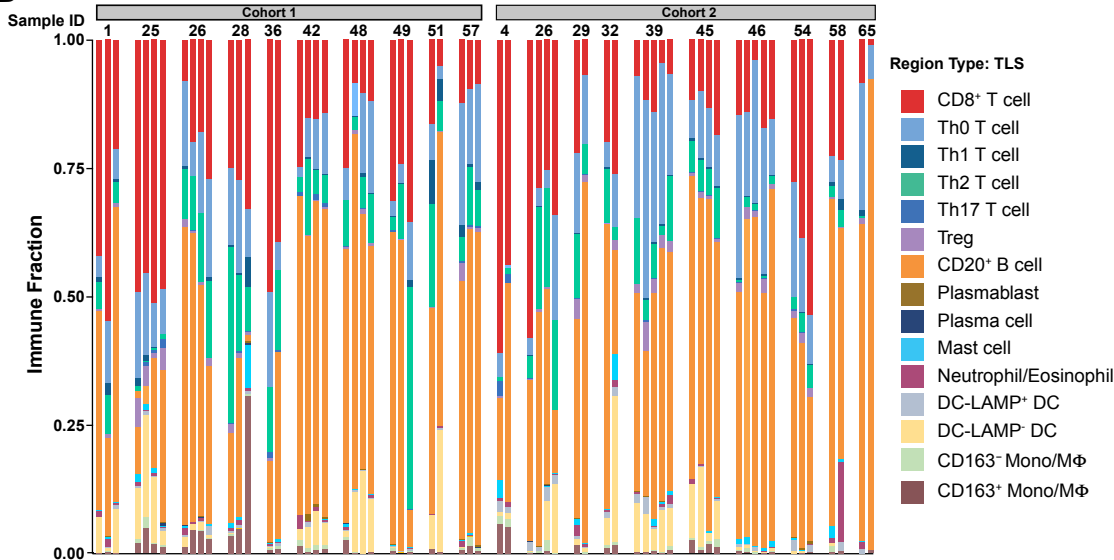**C**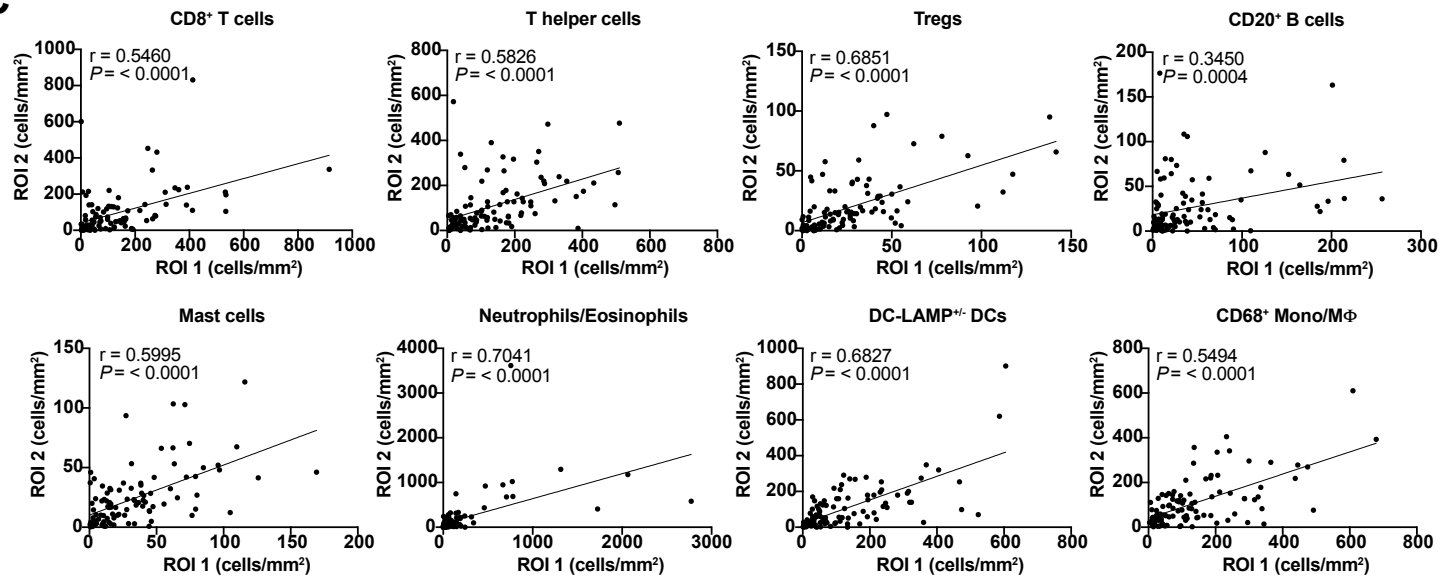

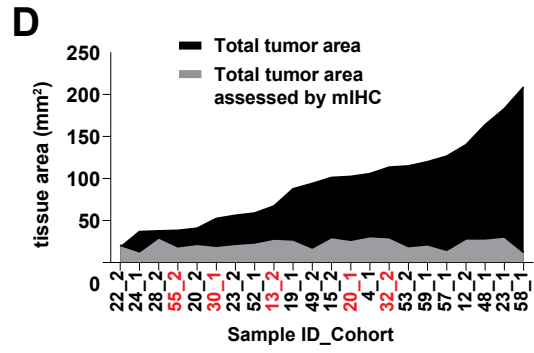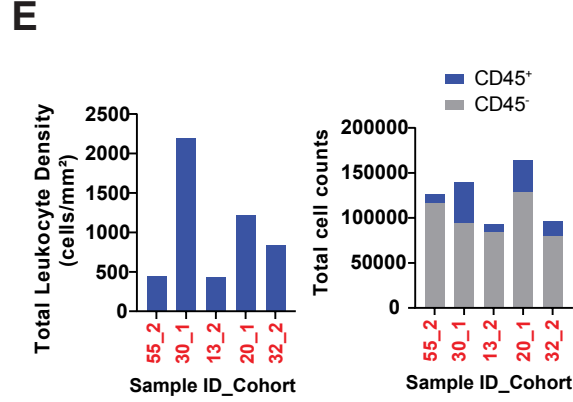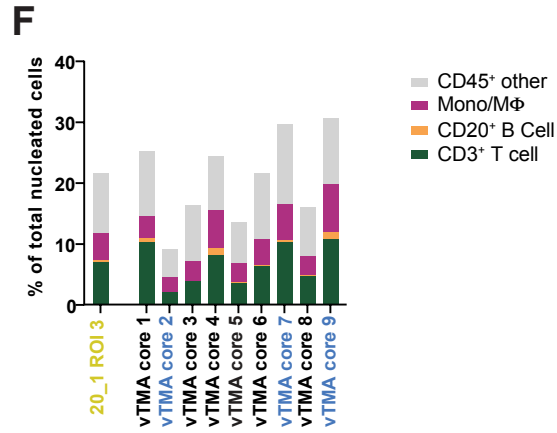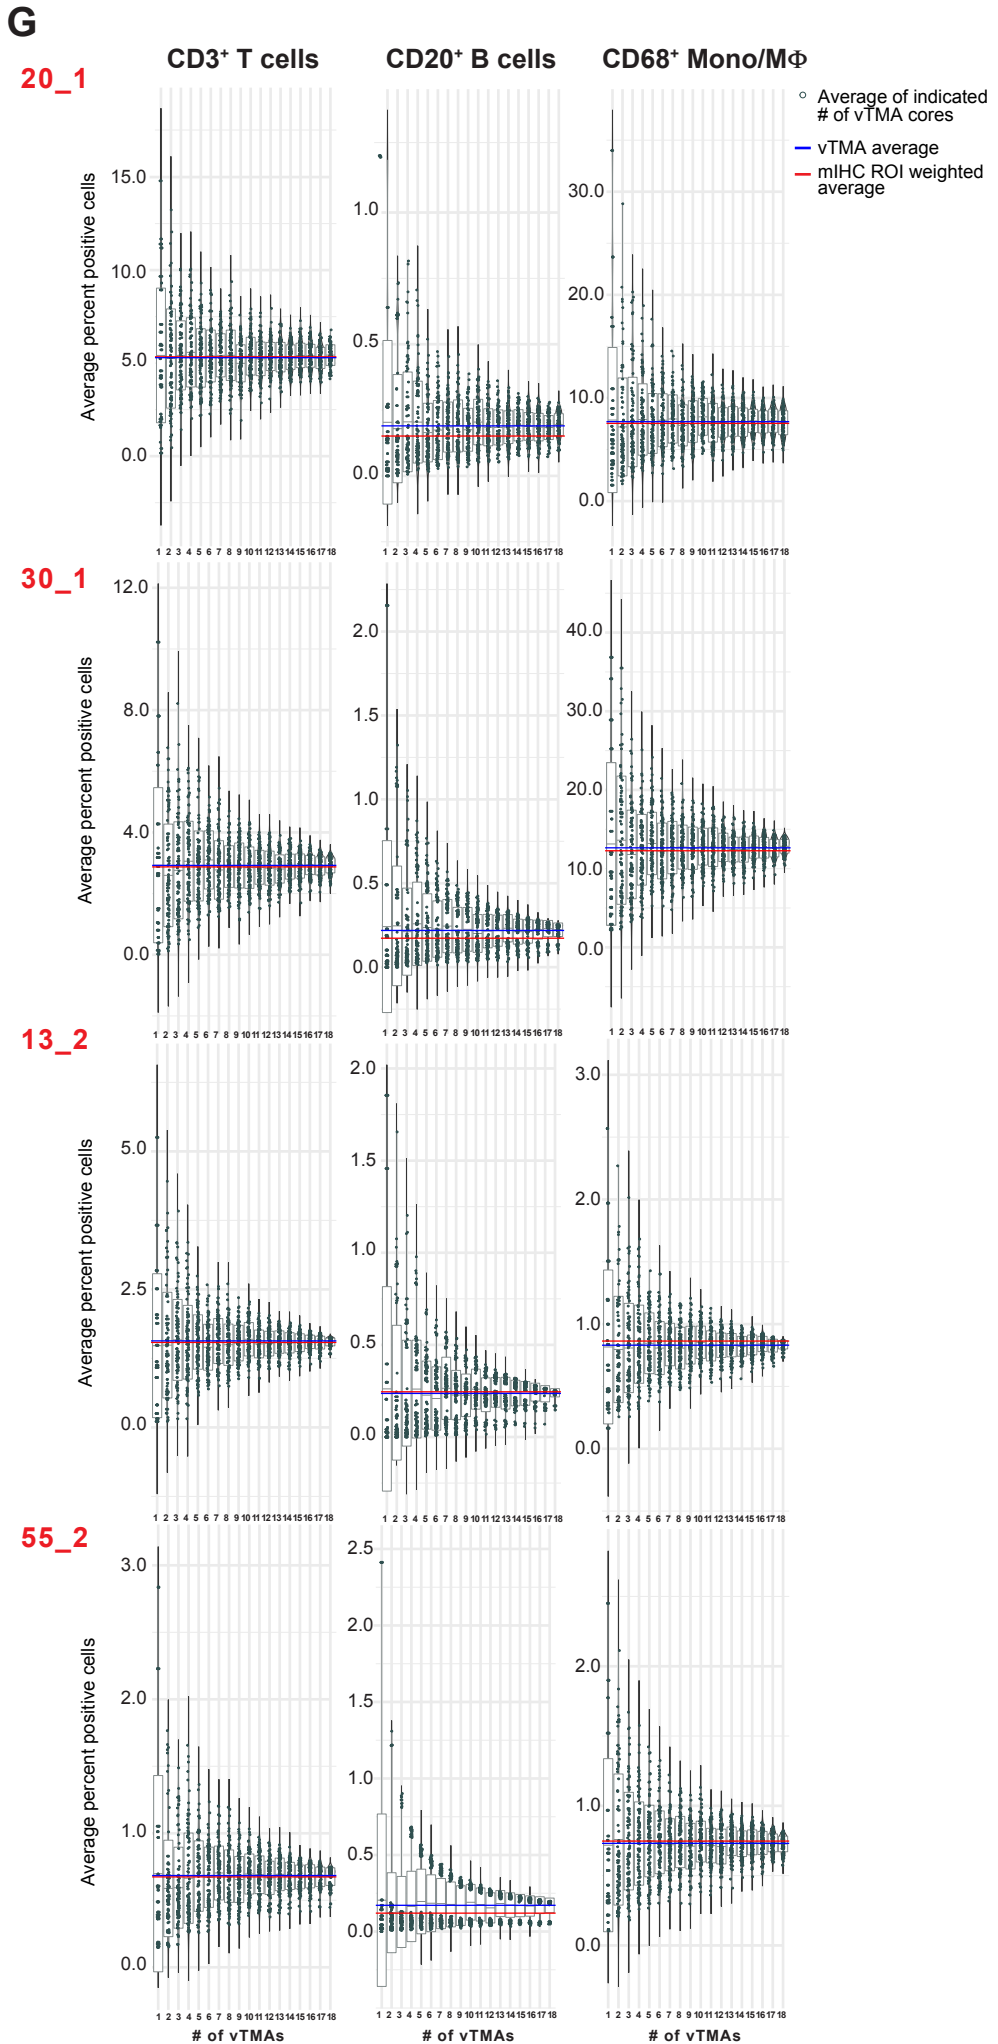

**Figure S5, related to Figure 5. Inpatient heterogeneity based on size and histopathology of assessed tissue**

**(A)** Leukocyte composition of individual regions of interest (ROIs) from a subsample of specimens from Cohorts 1 and 2 ( $n = 22$ ) illustrating relative abundance of cell populations in three 'T' (orange) and two 'TAS' (purple) regions from each patient. Dark gray bars (bottom) indicate total leukocyte density in log<sub>2</sub> scale for each ROI. **(B)** Leukocyte composition of 2 to 5 individual 'TAS' ROIs from a subsample of specimens from Cohorts 1 and 2 ( $n = 20$ ). **(C)** Spearman correlation coefficients were calculated between two 'T' mIHC ROIs per PDAC for the indicated leukocyte populations ( $n = 208$  ROIs from 104 treatment-naïve tumors). **(D)** Measurement of histopathologically-annotated invasive tumor areas for 22 representative PDAC specimens from Cohorts 1 and 2 (X-axis, sample ID is followed by underscore and cohort number). Black curve indicates total tumor area identified by a pathologist on one FFPE tissue section and gray curve indicates total tumor area included in T ROIs for mIHC analysis. Red text indicates samples used for subsequent vTMA analysis. **(E)** Total leukocyte density (left) and cell counts (right) for the 5 cases selected for vTMA analysis. Data displayed are averages of all T ROIs per sample. **(F)** Abundance of indicated cell populations in the entirety of T ROI3 of Sample 20\_1 (leftmost bar) as compared to nine individual vTMA cores placed within the ROI. **(G)** CD3<sup>+</sup> T cell (left), CD20<sup>+</sup> B cell (middle), and CD68<sup>+</sup> monocyte/macrophage (right) cell frequencies calculated from the average of 1-18 vTMA cores (x-axis) for 100 sample iterations. The vTMA average (blue line, sample reference) and mIHC ROI weighted averages (red line) are shown as solid lines.
